# Supplementary material for: Cellular dissection of psoriasis for transcriptome analyses and the post-GWAS era
Source: PubMed Central journal article supplement (PMC4060870; doi:10.1186/1755-8794-7-27), 2014-05-22

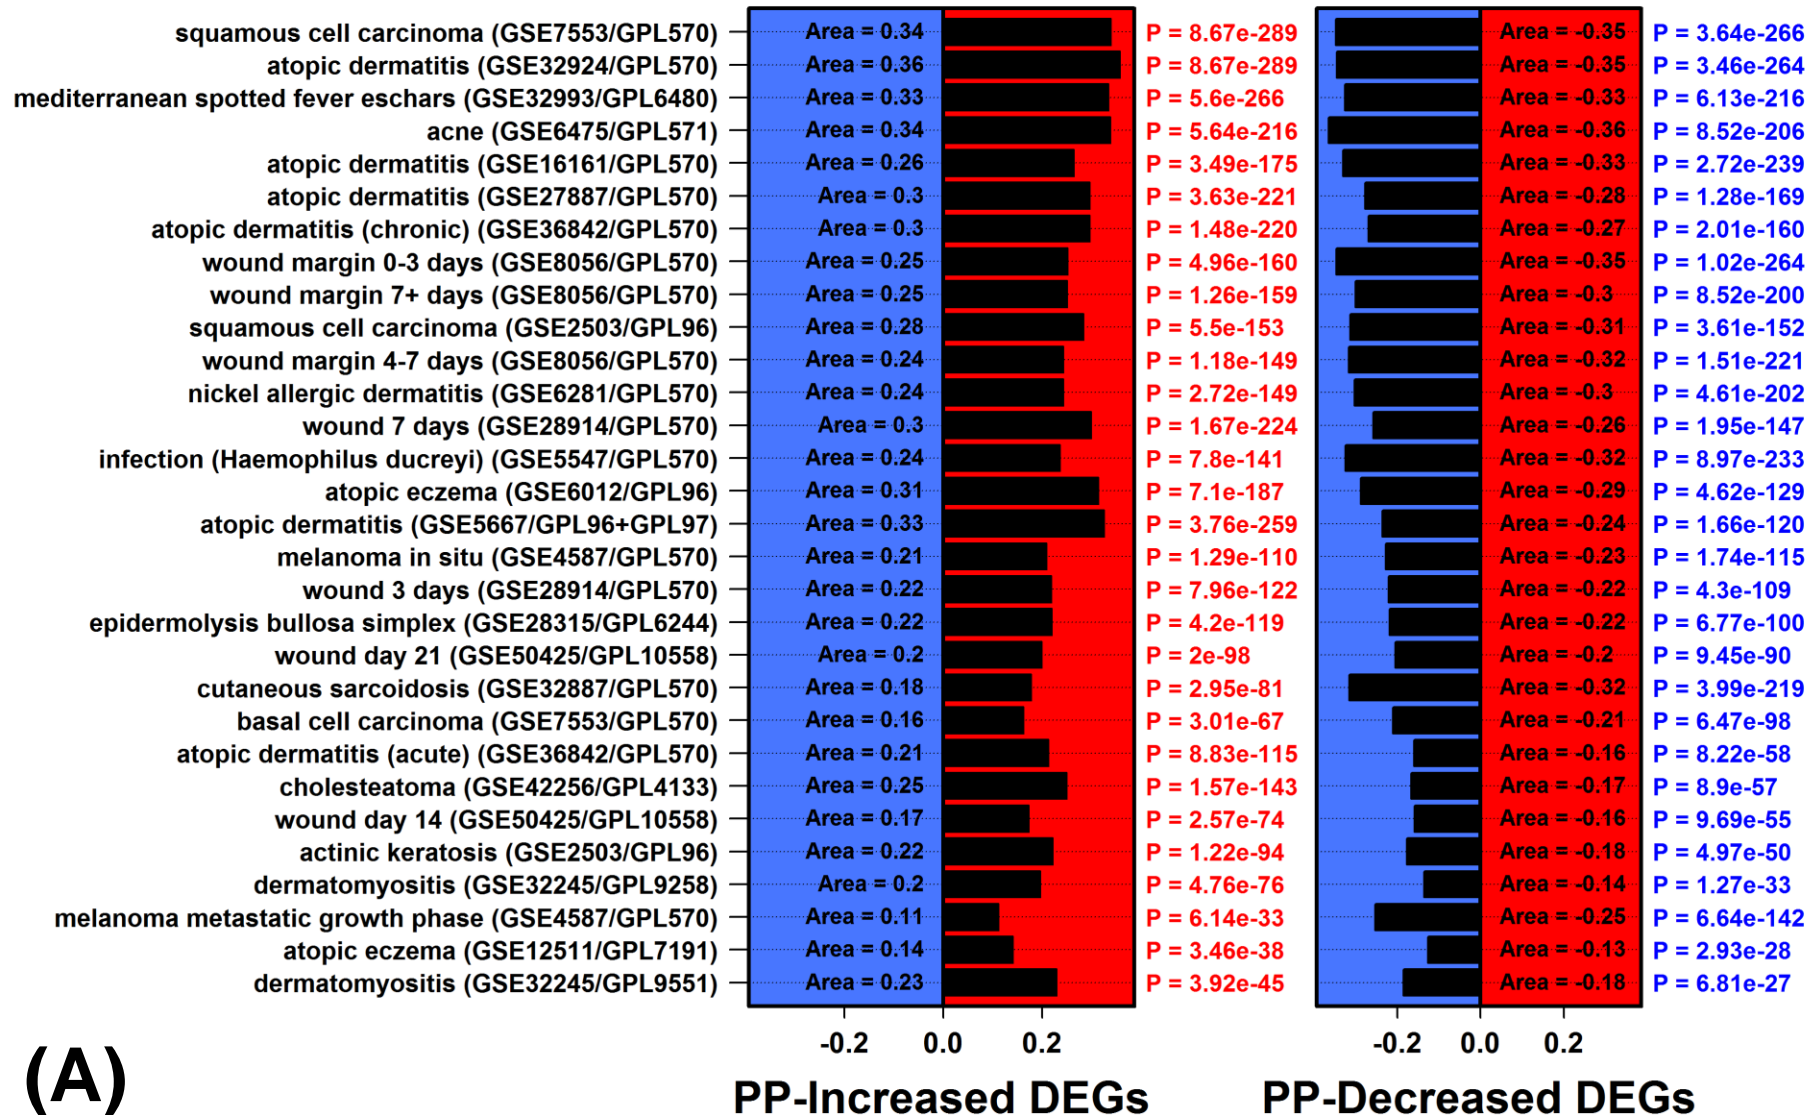

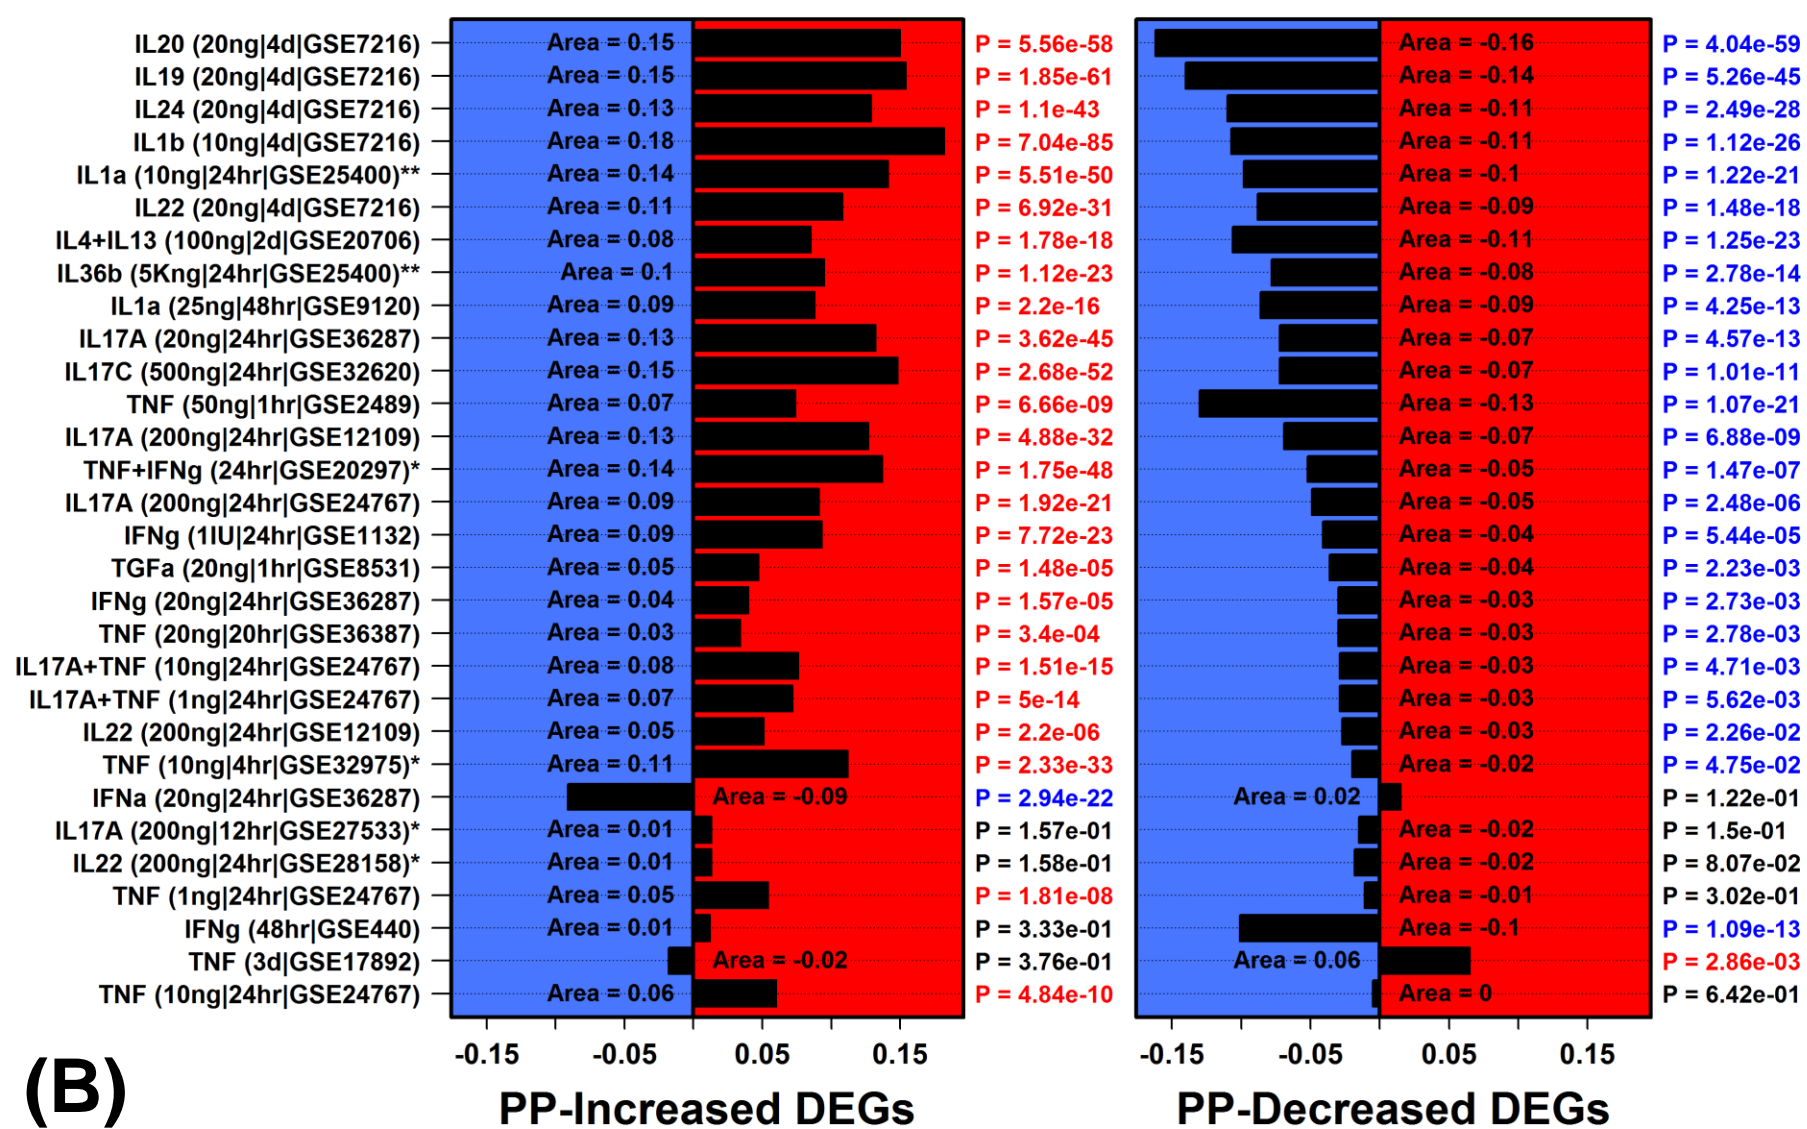

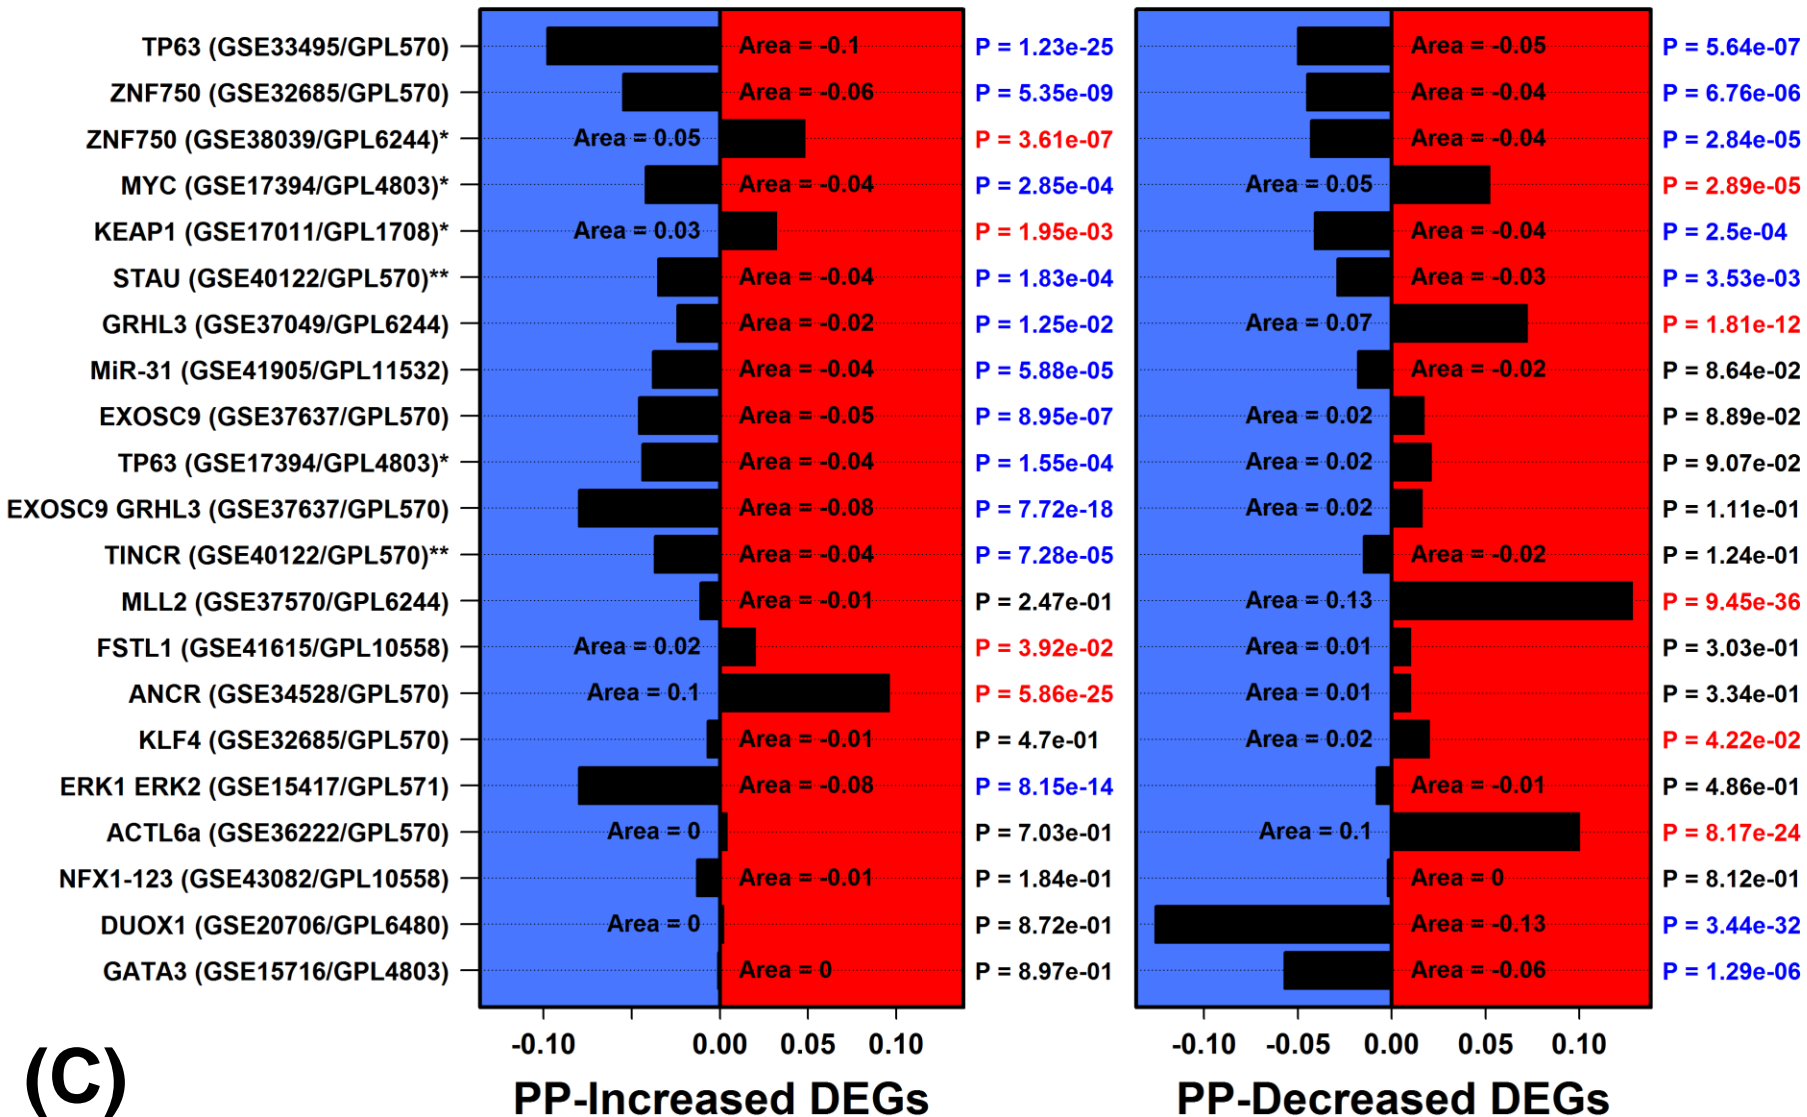

Supplement: 1755-8794-7-27-S4.pdf [file 1755-8794-7-27-S4.pdf]
